# Supplementary material
Source: HighWire-hosted journal article supplement (https://erj.ersjournals.com/content/57/5/2003730)
Supplement: inline-supplementary-material-1 [file inline-supplementary-material-1.pdf]

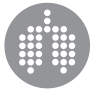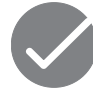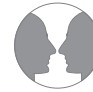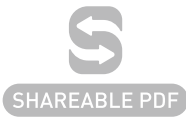

# Plasma ACE2 activity is persistently elevated following SARS-CoV-2 infection: implications for COVID-19 pathogenesis and consequences

Sheila K. Patel<sup>1,4</sup>, Jennifer A. Juno<sup>2,4</sup>, Wen Shi Lee<sup>2</sup>, Kathleen M. Wragg<sup>2</sup>, P. Mark Hogarth<sup>3</sup>, Stephen J. Kent<sup>2,5</sup> and Louise M. Burrell <sup>1,5</sup>

**Affiliations:** <sup>1</sup>Dept of Medicine, Austin Health, University of Melbourne, Melbourne, Australia. <sup>2</sup>Dept of Microbiology and Immunology, University of Melbourne at the Peter Doherty Institute for Infection and Immunity, Melbourne, Australia. <sup>3</sup>Immune Therapies Group, Burnet Institute, Melbourne, Australia. <sup>4</sup>Contributed equally. <sup>5</sup>S.J. Kent and L.M. Burrell contributed equally to this article as lead authors and supervised the work.

**Correspondence:** Louise M. Burrell, Dept of Medicine, University of Melbourne, Lance Townsend Building, Austin Health, Studley Road, Melbourne, Victoria 3084, Australia. E-mail: l.burrell@unimelb.edu.au

 @ERSpublications

**Plasma ACE2 activity is persistently elevated in patients after COVID-19 infection. Larger studies are needed to determine if this identifies people at risk of prolonged illness following COVID-19.** <https://bit.ly/2XQlrYF>

**Cite this article as:** Patel SK, Juno JA, Lee WS, *et al.* Plasma ACE2 activity is persistently elevated following SARS-CoV-2 infection: implications for COVID-19 pathogenesis and consequences. *Eur Respir J* 2021; 57: 2003730 [<https://doi.org/10.1183/13993003.03730-2020>].

This single-page version can be shared freely online.

*To the Editor:*

Coronavirus disease 2019 (COVID-19) causes persistent endothelial inflammation, lung, cardiovascular, kidney and neurological complications, and thromboembolic phenomena of unclear pathogenesis [1]. Severe acute respiratory syndrome-coronavirus-2 (SARS-CoV-2) utilises the catalytic site of full-length membrane-bound angiotensin converting enzyme 2 (ACE2) for host cell entry [2], which is thought to downregulate membrane-bound ACE2, and thus contribute to ongoing inflammation due to loss of a degradative pathway for angiotensin II. In healthy individuals, ACE2 exists primarily in its membrane-bound form with very low levels of the catalytically active ectodomain of ACE2 present in the circulation [3]. However, in patients with cardiovascular disease, there is increased “shedding” of ACE2, and higher circulating levels are associated with downregulation of membrane-bound ACE2 [4].
